1 Viral metagenomic analysis of the cheese surface: a comparative study of rapid procedures for  
2 extracting virus-like particles

3

4 Eric Dugat-Bony,<sup>a#</sup> Julien Lossouarn,<sup>b</sup> Marianne De Paepe,<sup>b</sup> Anne-Sophie Sarthou,<sup>a</sup> Yasmina  
5 Fedala,<sup>c</sup> Marie-Agnès Petit,<sup>b</sup> and Stéphane Chaillou<sup>b</sup>

6

7 <sup>a</sup>UMR782 GMPA, INRA, AgroParisTech, Université Paris-Saclay, Avenue Lucien  
8 Brétignières, 78850, Thiverval-Grignon, France

9 <sup>b</sup>UMR1319 MICALIS, INRA, AgroParisTech, Université Paris-Saclay, Domaine de Vilvert,  
10 78350, Jouy-en-Josas, France

11 <sup>c</sup>Institut Langevin, ESPCI Paris, CNRS, PSL University, 1 rue Jussieu, 75005 Paris, France

12

13 Running Head: Viral extraction procedure for cheese virome analysis

14

15 #Address correspondence to Eric Dugat-Bony, [eric.dugat-bony@inra.fr](mailto:eric.dugat-bony@inra.fr)

16

17 **KEYWORDS**

18 Cheese rind, viral metagenomic, VLPs extraction procedure

## 19 **ABSTRACT**

20 The structure and functioning of microbial communities from fermented foods, including  
21 cheese, have been extensively studied during the past decade. However, there is still a lack of  
22 information about both the occurrence and the role of viruses in modulating the function of  
23 this type of spatially structured and solid ecosystems. Viral metagenomics was recently  
24 applied to a wide variety of environmental samples and standardized procedures for  
25 recovering virus-like particles from different type of materials has emerged. In this study, we  
26 adapted a procedure originally developed to extract viruses from fecal samples, in order to  
27 enable efficient virome analysis of cheese surface. We tested and validated the positive  
28 impact of both addition of a filtration step prior to virus concentration and substitution of  
29 purification by density gradient ultracentrifugation by a simple chloroform treatment to  
30 eliminate membrane vesicles. Viral DNA extracted from the several procedures, as well as a  
31 vesicle sample, were sequenced using Illumina paired-end MiSeq technology and the  
32 subsequent clusters assembled from the virome were analyzed to assess those belonging to  
33 putative phages, plasmid-derived DNA, or even from bacterial chromosomal DNA. The best  
34 procedure was then chosen, and used to describe the Epoisses cheese virome. This study  
35 provides the basis of future investigations regarding the ecological importance of viruses in  
36 cheese microbial ecosystems.

37

## 38 **IMPORTANCE**

39 Whether bacterial viruses (phages) are necessary or not to maintain food ecosystem function  
40 is not clear. They could play a negative role by killing cornerstone species that are necessary  
41 for fermentation. But they might also be positive players, by preventing the overgrowth of  
42 unwanted species (*e.g.* food spoilers). To assess phages contribution to food ecosystem  
43 functioning, it is essential to set up efficient procedures for extracting viral particles in solid

44 food matrix, then selectively sequence their DNA without being contaminated by bacterial  
45 DNA, and finally to find strategies to assemble their genome out of metagenomic sequences.  
46 This study, using cheese rind surface as a model, describes a comparative analysis of  
47 procedures for selectively extracting viral DNA from cheese and to efficiently characterize  
48 the genome of dominant phages with cross-sample assembly.

## 49 INTRODUCTION

50 The cheese surface hosts dense and diverse microbial communities composed of bacteria,  
51 yeasts and filamentous fungi. Composition of these communities has been studied for decades  
52 (see (1) and (2) for reviews). With the help of high throughput sequencing techniques, we  
53 now have detailed pictures of the communities present in a large panel of cheese varieties, and  
54 from all over the world (3–6). However, like many other microbial ecosystems, there is still a  
55 lack of knowledge on whether and how viral diversity controls the structure of cheese surface  
56 microbiota.

57 Viruses infect all forms of life (7), from prokaryotes (8) to eukaryotes (9) and, in some  
58 particular cases, viruses themselves (10). In microbial ecosystems, viral predation is known to  
59 greatly influence the structure and functioning of microbial communities (11–13).  
60 Nevertheless, since virus genomes lack a single marker sequence for phylogenetic analysis,  
61 the structure and role of viral communities in nature are rarely evaluated. Recently, viral  
62 shotgun metagenomics helped to describe viral communities from environmental samples  
63 including ocean, freshwater, soil, mammalian gut and, to a minor extent, fermented food  
64 products (14). Nevertheless, there is currently no literature on the viral diversity of the cheese  
65 surface.

66 Protocols for extraction of virus-like particles (VLPs) have been optimized for different  
67 environments (15–18). For food samples, most available procedures have been designed for  
68 the recovery of foodborne viruses potentially affecting human health such as noroviruses,  
69 rotaviruses (RoV) and hepatitis viruses (19), but not for microbial viruses such as  
70 bacteriophages. Furthermore, because the cheese surface has peculiar characteristics such as  
71 the presence of caseins at high concentration, high fat and salt content, it proves necessary to  
72 set up a dedicated procedure. Ideally, the method should be easy-to-use and rapid enough to

73 be compatible with medium (dozens to hundred samples) to large-scale studies (hundreds to  
74 thousands samples) such as those performed to describe microbial communities (6).  
75 Taking into account all these constraints, we compared four procedures for the isolation of  
76 viruses from cheese surfaces. The backbone of the protocol followed the PEG-based protocol  
77 already evaluated by Castro-Mejia et al. on fecal samples (15). However, we replaced the  
78 buffer used for sample suspension, and tested both the effect of adding a filtration step before  
79 PEG precipitation in order to completely remove microbial cells and the substitution of the  
80 expensive and time-consuming density gradients for VLPs purification by a simple  
81 chloroform treatment which is used for membrane vesicles removal (20, 21) (Fig. 1). We  
82 evaluated the usefulness of the four procedures for cheese virome analysis (limited to the  
83 viruses with DNA genomes, expectedly the most abundant) using three different types of  
84 cheese, namely Camembert, Epoisses and Saint-Nectaire, and following two criteria: particles  
85 recovery and particles purity. Finally, we assessed the level of microbial DNA contamination  
86 in virome sequencing data for one type of cheese.

87

## 88 **RESULTS**

### 89 **Quantification and purity of VLPs recovered from the cheese surface.**

90 Among the four tested procedures, only those containing chloroform treatments (P2 and P4)  
91 resulted in VLP solutions sufficiently pure to allow nanoparticle counting using the  
92 interferometric light microscope (Table 1). We observed  $1 \times 10^9$  to  $4 \times 10^{10}$  nanoparticles per  
93 gram of cheese surface, and filtration did not induce a drastic loss of particles. Counts were  
94 higher in Epoisses and Camembert than in Saint-Nectaire cheese. Camembert had the highest  
95 nanoparticles per microbial cell ratios. This type of cheese had the lowest bacterial counts  
96 (Table S1), whether such a community leads to higher cell lysis mediated by viruses or higher  
97 levels of membrane vesicles remains to be investigated. VLP solutions prepared using

98 procedures P1 and P3, without chloroform treatment, were very dense, milk-white and led to  
99 hard noise in interferometer's films with a myriad of spots larger than those typically observed  
100 for viruses. Microbial cells clearly contaminated the VLP fractions when using procedures P1  
101 and P2, without filtration (Table 1, column 3). It has to be mentioned we also observed  
102 bacterial cells in one filtrated sample, *i.e.* Camembert cheese with P3, indicating probable  
103 post-filtration contamination.

104 Two-layer iodixanol gradients were used as quality controls in order to separate microbial  
105 cells, debris and membrane vesicles from viruses, enabling to visually observe the effect of  
106 the four procedures on the quantity and purity of VLP solutions (Fig. 2). For the three types of  
107 cheese tested, similar profiles were observed after ultracentrifugation. A strong band located  
108 at the top of the lightest density layer was present in samples prepared without filtration and  
109 chloroform treatment (P1) suggesting high contamination with microbial cells, debris and  
110 membrane vesicles (Fig. 2, red arrow). This band was still present – albeit slightly less intense  
111 – in filtered samples (P3), suggesting that cheese rind is rich in membrane vesicles. Finally,  
112 this band was completely absent from samples prepared with procedures including  
113 chloroform treatment (P2 and P4) confirming the efficiency of such treatment for removing  
114 membrane vesicles from VLP solutions (20). A visible band containing viruses formed at the  
115 proximity of the 45% iodixanol cushion (Fig. 2, blue arrow), at a density corresponding to  
116 40% iodixanol, as estimated with a refractometer. This virus band was barely visible,  
117 however, in samples treated with chloroform (P2 and P4) when compared to untreated  
118 samples (P1 and P3). Nanoparticles quantification using interferometry in the viral band of  
119 Epoisses samples after dialysis indicated that samples treated with chloroform (P2 and P4)  
120 contained approximately ten times less nanoparticles than untreated samples (P1 and P3). For  
121 Camembert cheese and procedure P3, we observed two distinct bands near the 45% iodixanol

122 cushion. Transmission electronic microscopy revealed that viruses were more abundant in the  
123 lowest one.

124 Altogether, these results suggest that filtration is an essential step in cheese VLPs preparation  
125 in order to completely eliminate microbial cells, which represent the major source of DNA  
126 contamination in virome studies. Furthermore, chloroform treatment is very beneficial for  
127 VLP solutions' cleaning and removal of membrane vesicles, which might contain pieces of  
128 microbial DNA (see below), but at the cost of reducing the nanoparticle recovery.

### 129 **Effect of the extraction procedure on the composition of the Epoisses virome**

130 Saint-Nectaire exhibited the lowest nanoparticles per cell ratio and Camembert the highest,  
131 Epoisses being an intermediate situation (Table 1). Furthermore, plate counting indicated a  
132 higher bacterial density in Epoisses cheese than in Camembert (Table S1), bacteria being  
133 expected as the main targets of microbial viruses (bacteriophages or phages) in the cheese  
134 ecosystem. For those two reasons, we selected Epoisses cheese as the best candidate for  
135 further virome analysis. DNA was successfully extracted from VLP solutions produced from  
136 Epoisses cheese using the four procedures and prior the gradient step. DNA yields are  
137 available in Table S2. DNA samples were then sequenced, in order to assess the impact of  
138 both filtration and chloroform treatment on the final sequence dataset (see Material and  
139 Methods section). In addition, for sample P3, the vesicle band was recovered from iodixanol  
140 gradient, DNA was extracted using the same protocol as viruses, and sequenced. The virome  
141 sequence data from each of the 12 samples (4 protocols x 3 biological replicates) and that of  
142 the vesicles sample were binned together for assembly of the virome (see Material and  
143 Methods section for more details).

144 Quality filtered reads were pooled and assembled into 910 contigs of length greater than  
145 2,500 bp, a threshold used for keeping putative small virus genomes (22). Of these, 124  
146 contigs were selected for further analysis based on VirSorter results and coverage criteria (see

147 Material and Methods section). These 124 contigs were ranging in size from 2.5 kb to 122 kb  
148 with a N50 of 24.4 kb and were designated as the Epoisses cheese virome. Mapping of the  
149 quality filtered reads against this virome revealed that microbial cell contamination was  
150 higher with protocol P1 and in the vesicles sample than in any of the other three protocols  
151 (Fig. 3).

152 The contigs were further analyzed and separated into four classes based on PHASTER and  
153 Blast results (*i.e.* probable phage contigs, plasmid-derived contigs, putative plasmid-derived  
154 contigs and unclassified contigs) (Dataset S1). Principal coordinate analysis performed on the  
155 Bray-Curtis dissimilarity index calculated from the abundance table of the 124 contigs (Fig.  
156 4A) showed an ordination of the samples according to the VLP extraction procedure, with  
157 samples obtained with P1 and P3 being separated from samples obtained with P2 and P4. This  
158 indicated a possible impact of the chloroform treatment on the quality of the resulting virome.  
159 Datasets produced with protocols P2, P3 and P4 were strikingly enriched for reads mapping to  
160 probable phage contigs (>99% in average) when compared to VLP fraction obtained with P1  
161 (94% in average) (Fig. 4B), which was largely explained by the higher proportion of  
162 unmapped reads present in P1 samples (Fig. 4F). The relative proportion of reads mapping to  
163 the 19 plasmid-derived contigs was greatly reduced in samples treated with P3 (filtration) and  
164 even more so in samples treated with P2 (chloroform) and P4 (chloroform and filtration),  
165 when compared to P1 (Fig. 4C), reflecting the positive impact of both filtration and  
166 chloroform treatment on the quality of the final virome. The relative proportions of reads  
167 matching putative plasmid-derived contigs (Fig. 4D) and unclassified contigs (Fig. 4E)  
168 remained similar regardless of the VLP extraction procedure.

169 Detailing the composition of each virome evidenced that the detection of contigs identified as  
170 probable phages was not affected by the VLP extraction procedure (Fig. 5), suggesting that  
171 neither the filtration step nor the chloroform treatment biased the sample composition. The



172 major differences were observed for the 39 contigs belonging to the categories plasmid and  
173 putative plasmid. Most of them were undetected or sporadically detected in samples treated  
174 with chloroform (P2, P4). They were on the contrary much higher with protocols P1 (and to a  
175 lesser extend P3) and highly abundant in the vesicles sample (39% of the reads). Interestingly,  
176 NODE-134, the most abundant contig detected in the vesicles sample (24 % relative  
177 abundance) and assigned to the plasmid-derived contig category, was only marginally  
178 detected in samples treated with protocols P1, P2, P3 and P4 (<0.005% relative abundance).

### 179 **Composition of the Epoisses cheese virome**

180 Three repeats of the extraction-sequencing on Epoisses cheese bought simultaneously from  
181 the same manufacturer gave highly reproducible results. Two contigs, NODE-1 and NODE-4,  
182 now named Epvir4 and 949\_Epvir1, were prevalent, representing relative mean abundances of  
183 63% and 28%, respectively. Epvir4 genome is 42 kb long. It was assigned by VirSorter as a  
184 category 2 phage (« quite sure ») but did not share similarity with already known phages. The  
185 annotation by RAST, HHpred and BLAST revealed an organization into functional modules  
186 (Fig. S1A). Amongst the ORFs with predicted homologues in nr database, most best BlastP  
187 matches (63%) were found in the genus *Glutamicibacter* (formerly *Arthrobacter*) suggesting  
188 that the host of this abundant phage might be a *Glutamicibacter* species (Dataset S2).  
189 949\_Epvir1 genome (Fig. S1B) is 122 kb long and shares 95% nucleotide identity and 95%  
190 coverage with *Lactococcus lactis* phage 949, a virulent phage (despite two predicted integrase  
191 genes) isolated from cheese whey in New Zealand (23). The third most abundant contig (1.1%  
192 of the reads), Epvir8, has a genome 41 kb in length, and shares a small 1.1 kb region with  
193 88% nucleotide identity with *Pseudoalteromonas* phage SL25 (24). Amongst the ORFs with  
194 predicted homologues, more than half (56%) were found in *Pseudoalteromonas* phages while  
195 another quarter (24%) were found in *Vibrio* phages (Dataset S2 and Fig. S1C)). All other  
196 contigs exhibited a relative abundance lower than 1%, most of them being difficult to assign

197 to a putative host. Nevertheless, few contigs were closely related to *Lactococcus lactis* phages  
198 (e.g. NODE-15, NODE-59, NODE-142), *Pseudoalteromonas* phages (e.g. NODE-48, NODE-  
199 276), *Vibrio* phages (e.g. NODE-12, NODE-116), *Leuconostoc* phages (e.g. NODE-18,  
200 NODE-658) and *Halomonas* phage (NODE-636). All of these bacterial genera are frequently  
201 detected as part of cheese surface (3). The best assignments carried out for all contigs are  
202 available in supplementary Dataset S1.

### 203 **DNA content of Epoisses membrane vesicles**

204 Much less DNA was present in membrane vesicles, compared to total viromes (Table S2).  
205 This has to be kept in mind when comparing the vesicle line to the virome lines in Fig. 5,  
206 since colors reflect only relative abundances. Almost 51% of the reads from the vesicles  
207 sample mapped to contigs assigned to potential phages, which indicated that phage DNA was  
208 present in the vesicles. Interestingly, the reads corresponding to plasmid-derived contigs were  
209 specifically enriched in membrane vesicles (10% of total), relative to the viromes (0.03%). It  
210 seems therefore that the plasmid content of samples P1 and P3, observed in Fig. 5, originate  
211 from membrane vesicles, which are still present since no chloroform treatment was applied in  
212 these protocols. The total DNA content obtained from the vesicles fraction was low, relative  
213 to viromes, with only 3.8 ng (Table S2), and corresponded to an estimated amount of  $1.3 \times$   
214  $10^{11}$  nanoparticles according to interferometry measures. Supposing all DNA content is  
215 plasmidic, with an average size of 5 kb for the plasmids (and a corresponding weight of 0.55  
216  $\times 10^{-17}$  g), 3.8 ng of DNA would amount to  $7 \times 10^8$  plasmidic DNA molecules, suggesting that  
217 only 0.5% of the vesicles effectively contain a DNA molecule. The same calculation for  
218 phage DNA (~50 kb) would result in 10-fold less DNA containing membrane vesicles.

219

### 220 **DISCUSSION**

221 With the increasing attraction for virome sequencing, protocols for extracting viruses from  
222 diverse environmental samples have been developed during the past decade. Prior to nucleic  
223 acid extraction and sequencing, these protocols usually included sample pretreatment to make  
224 viral particles accessible for extraction, virus concentration and finally virus purification (18).  
225 Each step has to be adapted, according to the type of samples studied and the type of virus  
226 targeted. For cheese, we chose to blend the samples after a dilution step in trisodium citrate,  
227 in order to maximize the chance for recovering viral particles from the matrix. Indeed, citrate  
228 is a complexing agent for calcium and allows casein solubilization. It is largely used in  
229 nucleic acid extraction protocols for recovering microbial cells from casein network in milk  
230 and cheese (25, 26).

231 We also decided to evaluate the potential benefit of adding a filtration step (0.22  $\mu\text{m}$ ) on the  
232 quality of VLPs preparation and of the resulting virome. Filtration is generally avoided in  
233 virus extraction protocols from environmental sources because some viruses can be very  
234 large, even larger than microbial cells (27). Nevertheless, our choice was motivated by the  
235 fact that (i) such large viruses are generally hosted by organisms which are not part of the  
236 cheese ecosystem such as amoebas, protists and microalgae (ii) it ensures complete removal  
237 of microbial cells which generally account for the major source of contaminating DNA  
238 sequences in virome studies (28). Our results demonstrated that adding filtration to the  
239 extraction procedure reduced microbial contamination of the cheese VLP solutions by  
240 microbial cells, without major modification neither in the particle counts nor in the final  
241 virome profile.

242 The best way to purify VLP includes a density gradient ultracentrifugation step (18), in which  
243 viruses are separated from other components of the extract based on their physical properties.  
244 This technique is, however, very time-consuming, expensive and requires specific technical  
245 skills and lab equipments. Chloroform treatment represents a possible alternative for rapid

246 and efficient virus purification (20, 29) and has already been used in the viral metagenomic  
247 context (30). This solvent permeabilizes the membranes of bacterial cells and membrane  
248 vesicles, disrupting their structural integrity and making nucleic acids available for digestion  
249 by nucleases. Our results indicate that such treatment, in combination with filtration, is  
250 mandatory for successful quantification of VLP extracted from cheese samples by  
251 interferometry. Even if viral capsids are said to be resistant to chloroform (20, 31), it is  
252 important to mention that some viruses, in particular enveloped viruses, might be lost after  
253 such treatment (18, 20, 21, 32). Comparing the Epoisses cheese VLP solutions obtained with  
254 procedures including chloroform treatment or not, indicated a loss of VLP upon chloroform  
255 treatment (as illustrated in Fig. 2). Analyzing the nanoparticle counts in the viral band of one  
256 Epoisses cheese after density gradient ultracentrifugation and dialysis indicated that we  
257 recovered approximately ten times less nanoparticles in chloroform-treated samples versus  
258 non-treated samples. However, this was accompanied by a limited reduction of the final DNA  
259 yields (<3 times less DNA in average for treated versus untreated samples, Table S2) and we  
260 did not observe qualitative differences in the abundances of viral contigs as a function of  
261 chloroform treatment. Furthermore, adding chloroform treatment to the extraction procedure  
262 resulted in a significant enrichment of the virome in actual viral sequences while drastically  
263 reducing the proportion of plasmids and sequences from microbial origin (unmapped reads).  
264 For one Epoisses, sequencing of the DNA content of a membrane vesicle fraction, obtained  
265 after separation from phage particles on an analytical density gradient, was performed. A low  
266 amount of DNA was recovered, in comparison with total viromes, suggesting that at most a  
267 few percent of the membrane vesicles contain DNA. This is in line with the current view that  
268 the transport of nucleic acids only constitutes one of many potential roles for membrane  
269 vesicles. Membrane vesicles are involved in exchanges between cells in the tree domains of  
270 life (33). In the bacterial domain, they have multifaceted roles including the delivery of

271 autolysins, cytotoxins and virulence factors, as well as nucleic acids (34, 35). In our  
272 membrane vesicle sample, DNA sequencing leads us to formulate several suppositions: i)  
273 since half of vesicle reads map to contigs classified as potential phages, it may be that  
274 Epoisses membrane vesicles serve as decoys and trap phages, as recently reported in *Vibrio*  
275 *cholerae* (36). The interaction between phage tail fibers and membrane vesicles harboring  
276 proper phage receptors could contribute to the emptying, and thereby inactivating of phage  
277 virions, after DNA injection. ii) The enrichment in reads corresponding to predicted plasmids,  
278 compared to total viromes, suggests that Epoisses membrane vesicles transport plasmid DNA,  
279 as described for an *Escherichia coli* strain (37). iii) A third category of DNA content in this  
280 vesicle fraction, composed of circular contigs that might be plasmidic but with no hit in  
281 databases, might not belong to vesicles. Indeed, the relative proportions of these contigs are  
282 similar in each virome, irrespective of the chloroform treatment. These DNA fragments might  
283 be packaged by transducing phage particles, which are more resistant to chloroform than  
284 vesicles. One has to suppose that such transducing particles have a lower density than *bona*  
285 *fide* phage particles to explain their presence together with vesicles fraction.

286 The set up of the protocol most adapted to recover viral communities from cheese rind was  
287 considerably facilitated by the use of a microscopic device called interferometer, allowing  
288 evaluating in real time the total nanoparticle counts (38, 39). It permitted in particular to  
289 choose, among several cheeses, those with higher nanoparticle titers for the present study.  
290 Camembert and Epoisses cheeses had markedly more nanoparticles, compared to Saint-  
291 Nectaire (Table 1). Camembert and Epoisses cheese are both soft cheeses, characterized by a  
292 bloomy and washed rind, respectively. These types of cheese typically have a higher moisture  
293 content than semi-soft pressed cheese with natural rind such as Saint-Nectaire (40, 41).  
294 Although a more comprehensive comparison including more cheese varieties would be

295 required, our results are congruent with the general assumption that viruses would be more  
296 abundant in hydrated environment, compared to dry ones.

297 The rapid procedure presented in this study enabled to obtain sufficient quantity of viral DNA  
298 from Epoisses cheese (equivalent of 1.5 gram as starting material for each protocol) for direct  
299 library preparation prior to sequencing, avoiding the use of multiple displacement  
300 amplification (MDA) (DNA quantities obtained for all samples presented in this study are  
301 available in Table S2). MDA is widely used in viral metagenomic studies due to the  
302 insufficient DNA material extracted from the samples (18). However, amplification bias has  
303 been documented for this technique (42) which might provoke distortion in the viral  
304 community profiles and making preferable direct DNA sequencing when possible.

305 The Epoisses virome analyzed in this study was composed of many contigs sharing high  
306 sequence identity with known *Lactococcus lactis* phages including the widely known 936,  
307 P335 and C2-like groups. Interestingly, the second most abundant one (28% of reads), named  
308 949\_Epvir1, was very similar to the *L. lactis* phage 949, a virulent phage isolated from cheese  
309 whey in New Zealand, which is phylogenetically distant from those groups of commonly  
310 isolated *L. lactis* phages (23). *Lactococcus lactis* is used as starter in the manufacture of  
311 Epoisses cheese. In a previous work describing the microbial diversity in twelve french  
312 cheese varieties, it was detected as the dominant bacterial taxa in the core of Epoisses cheese  
313 and was also highly detected in the rind (3). In the same study, other dominant bacterial  
314 genera of the Epoisses cheese rind included not-deliberately inoculated taxa such as, by order  
315 of importance, *Psychrobacter*, *Marinomonas*, *Vibrio*, *Pseudoalteromonas*, *Glutamicibacter*,  
316 *Mesonnia*, *Enterococcus*, *Lactobacillus* and *Halomonas*. Interestingly, phages potentially  
317 infecting some of such non-starter bacterial taxa, including *Glutamicibacter* (Epvir4, most  
318 abundant contig in the Epoisses virome, 63% of the reads), *Pseudoalteromonas* (Epvir8, third

319 most abundant contig, 1.1% of the reads), *Vibrio*, *Leuconostoc* and *Halomonas*, were also  
320 detected in the Epoisses cheese virome.

321 The cheese surface microbiota is in constant evolution during the ripening process, and is  
322 characterized by the successive development of different microbial groups. Microbial  
323 interactions between different species have been observed in cheese (43–46), providing the  
324 first elements of comprehension regarding biotic forces sustaining microbial assemblage in  
325 this peculiar environment. Our results indicate that many microbial species living on the  
326 cheese surface are also subjected to viral predation, and shed light on the need of careful  
327 evaluation of the impact of viruses on the dynamic of the cheese microbial ecosystem.

328

## 329 **CONCLUSION**

330 In this study, we optimized a rapid protocol for VLP extraction from the cheese matrix  
331 suitable for subsequent virome analysis. We demonstrated its efficiency by extracting VLPs  
332 from three different type of cheese and produced the first cheese surface virome using  
333 Epoisses cheese as a model. Our results emphasized the positive impact of both filtration and  
334 chloroform treatment on the final virome quality in the cheese context. In the future, we  
335 anticipate virome analysis will expand our knowledge on cheese microbial ecosystems and  
336 possibly give the opportunity to better understand the rules of microbial assembly that occur  
337 in this fermented food.

338

## 339 **MATERIAL AND METHODS**

### 340 **Sampling procedure**

341 Three types of French surface-ripened cheese were studied, namely Camembert (CAM,  
342 bloomy rind), Epoisses (EP, washed rind) and Saint-Nectaire (SN, natural rind). For each type  
343 of cheese, three cheeses produced at the same date and from a unique producer were

344 purchased and analyzed as replicates. Rind was gently separated from the core using sterile  
345 knives, and mixed using a blender.

### 346 **Microbiological analysis**

347 One gram of the cheese surface was diluted 1:10 in sterile saline solution (9 g/l NaCl) and  
348 homogenized with an Ultra Turrax Homogenizer (Labortechnik, Staufen, Germany) at full  
349 speed for 1 min. Serial dilutions were performed in 9 g/l NaCl and microorganisms were  
350 enumerated by surface plating in duplicate on specific agar base medium. Cheese-surface  
351 bacteria were enumerated on brain heart infusion agar (Biokar Diagnostics) supplemented  
352 with 22.5 mg/l amphotericin B after 3 to 5 days of incubation at 25°C under aerobic  
353 conditions. Lactic acid bacteria were enumerated on de Man-Rogosa-Sharpeagar (pH 6.5,  
354 Biokar Diagnostics) supplemented with 22.5 mg/l amphotericin B after 3 days of incubation  
355 at 30°C under anaerobic conditions. Finally, fungal populations were enumerated on yeast  
356 extract-glucose-chloramphenicol (Biokar Diagnostics) supplemented with 2,3,5-  
357 triphenyltetrazolium chloride (10 mg/l) after 3 to 5 days of incubation at 25°C under aerobic  
358 conditions.

### 359 **Extraction of virus-like particles (VLPs)**

360 Four protocols, named P1, P2, P3 and P4, were tested in parallel starting from the same  
361 material (Fig. 1). Six grams of cheese rind was diluted 1:10 with cold trisodium citrate (2%  
362 w/v) into a sterile bag and mixed for 1 min using a BagMixer (Interscience). Citrate is a  
363 complexing agent for calcium and allows casein solubilization. It is largely used in nucleic  
364 acid extraction protocols for recovering microbial cells from casein network in milk and  
365 cheese (25, 26). The solution was centrifuged at  $300 \times g$  for 10 min at 4°C in order to pellet  
366 big aggregates. The supernatant was centrifuged at  $5,000 \times g$  for 45 min at 4°C in order to  
367 pellet microbial cells. At this stage, the supernatant containing free VLPs was diluted 1:5 with  
368 cold SM buffer (200 mM NaCl, 10 mM MgSO<sub>4</sub>, 50 mM Tris pH 7.5) and split, half being



369 used for filtration-free protocols (protocols P1 and P2) and half being successively filtrated  
370 using 0.45 $\mu$ m and 0.2 $\mu$ m polyethersulfone membranes and glass vacuum filter holders  
371 (Millipore) (protocols P3 and P4). Samples, filtrated or not, were then supplemented with  
372 10% PEG 6,000 (Sigma) and kept at 4°C over-night after dissolution for VLPs precipitation.  
373 After centrifugation at 6,000  $\times$  g for 1h at 4°C, pellets were resuspended with 2 ml of cold SM  
374 buffer and split again, half being stocked at 4°C (protocols P1 and P3) and half being treated  
375 with chloroform in order to eliminate membrane vesicles (protocols P2 and P4). More  
376 specifically, 1 volume of fresh, non-oxidized chloroform was added to the sample and mixed  
377 thoroughly for 1 min using a vortex to create an emulsion. After centrifugation at 15,000  $\times$  g  
378 for 5 min at 4°C, the aqueous phase containing viral particles was recovered.

### 379 **Particles counting using Interferometry**

380 A “home-made” interferometric light microscope (ILM) (38) was used to count nanoparticles  
381 (i.e. both vesicles and viruses) present in our VLP fractions as previously described (39).  
382 Briefly, 5  $\mu$ l of each sample were used to collect a stack of 200 images (CMOS camera). We  
383 developed a simple ImageJ (47) script that allows first background subtraction and image  
384 quality enhancement, then particles localization on each image. An average number of  
385 nanoparticles per frame was obtained. To calibrate the concentration estimates, crude lysates  
386 of phages P1, T4, T5, T7,  $\lambda$ CI857 and  $\phi$ X174 were titrated on *Escherichia coli* MG1655, and  
387 counted with the ILM device. These counts were converted into concentrations, assuming that  
388 all particles present in the observation volume ( $10^{-8}$  ml) were detected with the ILM device.  
389 Table S3 and Fig. S2 showed a good match between the two measurements, usually within a  
390 +/- 3 fold range for phages P1, T4, T5, T7 and  $\lambda$ CI857, whereas  $\phi$ X174 was underestimated  
391 by 20 fold. We next compared the ILM estimates with epifluorescence microscopy on two  
392 VLP samples obtained from Epoisses cheese (Fig. S3). As shown in the result section, virome  
393 samples of Epoisses rind also contain vesicles, which are detected by ILM, but not by

394 epifluorescence, since they mostly do not contain DNA. In accordance with expectations, 1.5  
395 to 1.9-fold more particles were counted by ILM than by epifluorescence. We concluded that  
396 the ILM measurements give reasonable estimates of nanoparticle concentrations (both  
397 vesicles and VLP) of viromes.

#### 398 **Particles purity evaluation using iodixanol gradients**

399 Two-layer iodixanol discontinuous gradients of 45% and 20% (w/v) in SM Buffer (50 mM  
400 Tris pH7.5, 100 mM NaCl, 10 mM MgCl<sub>2</sub>) were prepared by adding first 6 ml of the 20%  
401 fraction in a 12 ml ultracentrifugation tube, and then under layering 4.5 ml of the 45% fraction  
402 in the bottom of the tube, using a glass transfer pipette and a pipette pump. Each VLP solution  
403 (1 ml diluted 1:2 with SM Buffer) was finally added on top of the gradient and the tubes were  
404 centrifuged at  $200,000 \times g$  for 5 h at 10°C, in an SW41 rotor, using a Beckman XL-90  
405 ultracentrifuge.

#### 406 **Viral DNA extraction**

407 500 µl of the VLPs preparation were treated for 30 min at 37°C with 1 U of TURBO DNase  
408 (Invitrogen) in order to digest free DNA. DNase was inactivated by the addition of 5.5 µl of  
409 100 mM EDTA and the sample was placed on ice for 5 min. The entire content of the tube  
410 was transferred to a 2 ml tube containing a gel that improves separation between the aqueous  
411 and organic phases (Phase Lock Gel Heavy; Eppendorf AG, Hamburg, Germany). One  
412 volume of phenol-chloroform (1:1; saturated with 10 mM Tris pH 8.0, and 1 mM EDTA) was  
413 added to the sample and, after gentle mixing for 1 min by inversion, the tube was centrifuged  
414 at  $10,000 \times g$  for 10 min at 4°C. The aqueous phase was then transferred to another Phase  
415 Lock Gel tube. After adding one volume of phenol-chloroform and gentle mixing for 1 min  
416 by inversion, centrifugation was performed at  $10,000 \times g$  for 10 min at 4°C. The aqueous  
417 phase was then transferred to another Phase Lock Gel tube. After adding one volume of  
418 chloroform and gentle mixing for 1 min by inversion, centrifugation was performed at  $10,000$

419  $\times g$  for 10 min at 4°C. The aqueous phase (approximately 300  $\mu$ l) was recovered in a 1.5 ml  
420 tube and DNA was precipitated by adding two volumes of absolute ethanol, 50  $\mu$ l of sodium  
421 acetate (3 M, pH 5.2) and 3  $\mu$ l of glycogen (5 mg/ml; Invitrogen) as carrier. After incubation  
422 on ice for 10 min, the DNA was recovered by centrifugation at 13,000  $\times g$  for 30 min at 4°C.  
423 The DNA pellet was subsequently washed with 800  $\mu$ l of 70% (vol/vol) ethanol. After  
424 centrifugation at 13,000  $\times g$  for 10 min at 4°C, the DNA pellet was dried at room temperature  
425 for 30 min and dissolved in 20  $\mu$ l of 10 mM Tris pH 7.5. Purified DNA was quantified using  
426 the Qubit DNA Broad Range assay (ThermoFisher Scientific).

#### 427 **Viral DNA sequencing and bioinformatic analysis**

428 Library preparation and sequencing were performed at the GeT-PlaGe platform (Toulouse,  
429 France). Briefly, libraries were prepared using the NEBNext® Ultra™ II DNA Library Prep  
430 Kit (New England Biolabs) and sequencing was performed on the MiSeq platform (Illumina)  
431 according to the manufacturer's instructions. Raw reads were quality filtered using  
432 Trimmomatic (Bolger et al., 2014) in order to remove paired reads with bad qualities (with  
433 length < 125 bp, with remnant of Illumina adapters and with average quality values below  
434 Q20 on a sliding window of 4 nt). Furthermore, only the remaining paired reads were kept  
435 while those being unpaired at the end of the filtering process were kept aside. The overall  
436 filtering process yielded an average of 1.36 million paired-end reads (2  $\times$  250 bp) per sample  
437 (2.72 million reads total). All quality-filtered reads from the various experiments were pooled  
438 in order to proceed to only one global assembly. Therefore, reads from similar phages but  
439 present in several samples would be binned together during the assembly process. Assembly  
440 was performed using SPAdes with the *meta* option and increasing *kmer* values -k  
441 21,33,55,77,99,127 (48). Contigs with length below 2,500 bp, unlikely to encode complete  
442 viruses, were discarded. The resulting 910 filtered contigs were first analyzed with VirSorter  
443 (49), which returned 92 putative viral contigs. A list of “most abundant and pertinent” contigs

444 was constructed using three criteria: 1) detected as viral with Virsorter, after filtering out  
445 those placed in categories 3 or 6 (not so sure) with coverage below 10 (remaining 78 contigs),  
446 2) detected as circular contig, even if not detected as viral (adds 34 contigs) 3) coverage above  
447 100, even if not detected as viral (final list of 124 contigs). These contigs were further  
448 analyzed using PHASTER (50) and compared to both the Viruses section of nucleotide  
449 database at NCBI and to the complete database using Blast (51) in order to provide a first  
450 characterization of putative phage-encoding contigs. Then, quality filtered reads (both paired  
451 and unpaired) were mapped individually for each sample against the potential viral contigs  
452 using Bowtie2 aligner with default values (52) in order to produce an abundance table. This  
453 table was processed with the R package Phyloseq for statistical analysis and data visualization  
454 (53). The level of bacterial DNA contamination in the cheese viromes was estimated by  
455 detection of ribosomal DNAs among the reads using SortMeRNA software (54) and the  
456 SILVA v129 database (55). The three most prevalent contigs present in the final virome,  
457 namely Epvir4, 949\_Epvir1 and Epvir8, were further annotated using RAST (56). Homologs  
458 of the predicted proteins in the contigs were additionally compared to the NCBI nr database  
459 using BlastP and HHpred (57) with an E-value cutoff of  $10^{-8}$ .

#### 460 **Accession numbers**

461 Raw sequence data were deposited at the Sequence Read Archive of the National Center for  
462 Biotechnology Information under the accession numbers SRR8080803 to SRR8080815  
463 (bioproject PRJNA497596).

464

#### 465 **ACKNOWLEDGMENTS**

466 This work was conducted in the frame of the Virome Access project supported by the French  
467 National Institute for Agricultural Research (INRA) and the Meta-omics and Microbial  
468 Ecosystems (MEM) programme. The funders had no role in study design, data collection and

469 interpretation, or the decision to submit the work for publication. We are grateful to Martine  
470 and Claude Boccara for their invaluable help with the interferometer device. We thank the  
471 INRA GeT-PlaGE platform (<https://get.genotoul.fr/la-plateforme/get-plage>) for sequencing  
472 the Epoisses virome and the INRA MIGALE bioinformatics platform  
473 (<http://migale.jouy.inra.fr>) for providing computational resources and support.

474

## 475 REFERENCES

- 476 1. Irlinger F, Layec S, Hélinck S, Dugat-Bony E. 2015. Cheese rind microbial communities: diversity,  
477 composition and origin. *FEMS Microbiol Lett* 362:1–11.
- 478 2. Montel M-C, Buchin S, Mallet A, Delbes-Paus C, Vuitton DA, Desmasures N, Berthier F. 2014.  
479 Traditional cheeses: Rich and diverse microbiota with associated benefits. *International Journal*  
480 *of Food Microbiology* 177:136–154.
- 481 3. Dugat-Bony E, Garnier L, Denonfoux J, Ferreira S, Sarthou A-S, Bonnarme P, Irlinger F. 2016.  
482 Highlighting the microbial diversity of 12 French cheese varieties. *International Journal of Food*  
483 *Microbiology* 238:265–273.
- 484 4. Murugesan S, Reyes-Mata MP, Nirmalkar K, Chavez-Carbajal A, Juárez-Hernández JI, Torres-  
485 Gómez RE, Piña-Escobedo A, Maya O, Hoyo-Vadillo C, Ramos-Ramírez EG, Salazar-Montoya JA,  
486 García-Mena J. 2018. Profiling of bacterial and fungal communities of Mexican cheeses by high  
487 throughput DNA sequencing. *Food Research International* 113:371–381.
- 488 5. Quigley L, O’Sullivan O, Beresford TP, Ross RP, Fitzgerald GF, Cotter PD. 2012. High-throughput  
489 sequencing for detection of subpopulations of bacteria not previously associated with artisanal  
490 cheeses. *Applied and Environmental Microbiology* 78:5717–5723.
- 491 6. Wolfe BE, Button JE, Santarelli M, Dutton RJ. 2014. Cheese rind communities provide tractable  
492 systems for in situ and in vitro studies of microbial diversity. *Cell* 158:422–433.

- 493 7. Hyman P, Abedon ST, Hyman P, Abedon ST. 2012. Smaller fleas: viruses of microorganisms.  
494 *Scientifica* 2012:e734023.
- 495 8. Clokie MRJ, Millard AD, Letarov AV, Heaphy S. 2011. Phages in nature. *Bacteriophage* 1:31–45.
- 496 9. Koonin Eugene V., Krupovic Mart, Yutin Natalya. 2015. Evolution of double-stranded DNA  
497 viruses of eukaryotes: from bacteriophages to transposons to giant viruses. *Annals of the New*  
498 *York Academy of Sciences* 1341:10–24.
- 499 10. La Scola B, Desnues C, Pagnier I, Robert C, Barrassi L, Fournous G, Merchat M, Suzan-Monti M,  
500 Forterre P, Koonin E, Raoult D. 2008. The virophage as a unique parasite of the giant mimivirus.  
501 *Nature* 455:100–104.
- 502 11. de Melo AG, Levesque S, Moineau S. 2018. Phages as friends and enemies in food processing.  
503 *Current Opinion in Biotechnology* 49:185–190.
- 504 12. Fernández L, Rodríguez A, García P. 2018. Phage or foe: an insight into the impact of viral  
505 predation on microbial communities. *The ISME Journal* 12:1171.
- 506 13. Sime-Ngando T. 2014. Environmental bacteriophages: viruses of microbes in aquatic  
507 ecosystems. *Front Microbiol* 5:355.
- 508 14. Park E-J, Kim K-H, Abell GCJ, Kim M-S, Roh SW, Bae J-W. 2011. Metagenomic analysis of the  
509 viral communities in fermented foods. *Appl Environ Microbiol* 77:1284–1291.
- 510 15. Castro-Mejía JL, Muhammed MK, Kot W, Neve H, Franz CMAP, Hansen LH, Vogensen FK,  
511 Nielsen DS. 2015. Optimizing protocols for extraction of bacteriophages prior to metagenomic  
512 analyses of phage communities in the human gut. *Microbiome* 3:64.
- 513 16. Conceição-Neto N, Zeller M, Lefrère H, Bruyn PD, Beller L, Deboutte W, Yinda CK, Lavigne R,  
514 Maes P, Ranst MV, Heylen E, Matthijssens J. 2015. Modular approach to customise sample

- 515 preparation procedures for viral metagenomics: a reproducible protocol for virome analysis.  
516 Scientific Reports 5:16532.
- 517 17. Kleiner M, Hooper LV, Duerkop BA. 2015. Evaluation of methods to purify virus-like particles for  
518 metagenomic sequencing of intestinal viromes. BMC Genomics 16.
- 519 18. Thurber RV, Haynes M, Breitbart M, Wegley L, Rohwer F. 2009. Laboratory procedures to  
520 generate viral metagenomes. Nature Protocols 4:470–483.
- 521 19. Stals A, Baert L, Van Coillie E, Uyttendaele M. 2012. Extraction of food-borne viruses from food  
522 samples: A review. International Journal of Food Microbiology 153:1–9.
- 523 20. Biller SJ, McDaniel LD, Breitbart M, Rogers E, Paul JH, Chisholm SW. 2017. Membrane vesicles in  
524 sea water: heterogeneous DNA content and implications for viral abundance estimates. The  
525 ISME Journal 11:394–404.
- 526 21. Forterre P, Soler N, Krupovic M, Marguet E, Ackermann H-W. 2013. Fake virus particles  
527 generated by fluorescence microscopy. Trends in Microbiology 21:1–5.
- 528 22. Varsani A, Krupovic M. 2018. Smacoviridae: a new family of animal-associated single-stranded  
529 DNA viruses. Arch Virol 163:2005–2015.
- 530 23. Samson JE, Moineau S. 2010. Characterization of Lactococcus lactis phage 949 and comparison  
531 with other lactococcal phages. Appl Environ Microbiol 76:6843–6852.
- 532 24. Liu Z, Li H, Wang M, Jiang Y, Yang Q, Zhou X, Gong Z, Liu Q, Shao H. 2018. Isolation,  
533 characterization and genome sequencing of the novel phage SL25 from the Yellow Sea, China.  
534 Marine Genomics 37:31–34.

- 535 25. Randazzo CL, Torriani S, Akkermans ADL, de Vos WM, Vaughan EE. 2002. Diversity, dynamics,  
536 and activity of bacterial communities during production of an artisanal Sicilian cheese as  
537 evaluated by 16S rRNA analysis. *Appl Environ Microbiol* 68:1882–1892.
- 538 26. Ulve V m., Monnet C, Valence F, Fauquant J, Falentin H, Lortal S. 2008. RNA extraction from  
539 cheese for analysis of in situ gene expression of *Lactococcus lactis*. *Journal of Applied*  
540 *Microbiology* 105:1327–1333.
- 541 27. Aherfi S, Colson P, La Scola B, Raoult D. 2016. Giant viruses of amoebas: an update. *Front*  
542 *Microbiol* 7.
- 543 28. Roux S, Krupovic M, Debroas D, Forterre P, Enault F. 2013. Assessment of viral community  
544 functional potential from viral metagenomes may be hampered by contamination with cellular  
545 sequences. *Open Biology* 3:130160.
- 546 29. Guo P, El-Gohary Y, Prasad K, Shiota C, Xiao X, Wiersch J, Paredes J, Tulachan S, Gittes GK.  
547 2012. Rapid and simplified purification of recombinant adeno-associated virus. *J Virol Methods*  
548 183:139–146.
- 549 30. Willner D, Furlan M, Schmieder R, Grasis JA, Pride DT, Relman DA, Angly FE, McDole T, Mariella  
550 RP, Rohwer F, Haynes M. 2011. Metagenomic detection of phage-encoded platelet-binding  
551 factors in the human oral cavity. *PNAS* 108:4547–4553.
- 552 31. Jurczak-Kurek A, Gąsior T, Nejman-Faleńczyk B, Bloch S, Dydecka A, Topka G, Necel A,  
553 Jakubowska-Deredas M, Narajczyk M, Richert M, Mieszkowska A, Wróbel B, Węgrzyn G,  
554 Węgrzyn A. 2016. Biodiversity of bacteriophages: morphological and biological properties of a  
555 large group of phages isolated from urban sewage. *Scientific Reports* 6:34338.
- 556 32. Weynberg KD, Wood-Charlson EM, Suttle CA, Oppen V, H MJ. 2014. Generating viral  
557 metagenomes from the coral holobiont. *Front Microbiol* 5.



- 558 33. Deatherage BL, Cookson BT. 2012. Membrane vesicle release in bacteria, eukaryotes, and  
559 archaea: a conserved yet underappreciated aspect of microbial life. *Infection and Immunity*  
560 80:1948–1957.
- 561 34. Jan AT. 2017. Outer membrane vesicles (OMVs) of gram-negative bacteria: a perspective  
562 update. *Frontiers in Microbiology* 8.
- 563 35. Toyofuku M, Nomura N, Eberl L. 2018. Types and origins of bacterial membrane vesicles.  
564 *Nature Reviews Microbiology*.
- 565 36. Reyes-Robles T, Dillard RS, Cairns LS, Silva-Valenzuela CA, Housman M, Ali A, Wright ER, Camilli  
566 A. 2018. *Vibrio cholerae* outer membrane vesicles inhibit bacteriophage infection. *Journal of*  
567 *Bacteriology* 200.
- 568 37. Yaron S, Kolling GL, Simon L, Matthews KR. 2000. Vesicle-mediated transfer of virulence genes  
569 from *Escherichia coli* O157:H7 to other enteric bacteria. *Applied and Environmental*  
570 *Microbiology* 66:4414–4420.
- 571 38. Boccara M, Fedala Y, Bryan CV, Bailly-Bechet M, Bowler C, Boccara AC. 2016. Full-field  
572 interferometry for counting and differentiating aquatic biotic nanoparticles: from laboratory to  
573 Tara Oceans. *Biomed Opt Express* 7:3736–3746.
- 574 39. Roose-Amsaleg C, Fedala Y, Vénien-Bryan C, Garnier J, Boccara A-C, Boccara M. 2017. Utilization  
575 of interferometric light microscopy for the rapid analysis of virus abundance in a river. *Research*  
576 *in Microbiology* 168:413–418.
- 577 40. Almena-Aliste M, Mietton B. 2014. Cheese classification, characterization, and categorization: a  
578 global perspective. *Microbiology Spectrum* 2.

- 579 41. McSweeney PLH, Ottogalli G, Fox PF. 2017. Chapter 31 - Diversity and Classification of Cheese  
580 Varieties: An Overview, p. 781–808. *In* McSweeney, PLH, Fox, PF, Cotter, PD, Everett, DW (eds.),  
581 Cheese (Fourth Edition). Academic Press, San Diego.
- 582 42. Pinard R, de Winter A, Sarkis GJ, Gerstein MB, Tartaro KR, Plant RN, Egholm M, Rothberg JM,  
583 Leamon JH. 2006. Assessment of whole genome amplification-induced bias through high-  
584 throughput, massively parallel whole genome sequencing. *BMC Genomics* 7:216.
- 585 43. Irlinger F, Mounier J. 2009. Microbial interactions in cheese: implications for cheese quality and  
586 safety. *Current Opinion in Biotechnology* 20:142–148.
- 587 44. Kastman EK, Kamelamela N, Norville JW, Cosetta CM, Dutton RJ, Wolfe BE. 2016. Biotic  
588 interactions shape the ecological distributions of *Staphylococcus* species. *mBio* 7:e01157-16.
- 589 45. Mounier J, Monnet C, Vallaeyts T, Arditi R, Sarthou A-S, Helias A, Irlinger F. 2008. Microbial  
590 interactions within a cheese microbial community. *Applied and Environmental Microbiology*  
591 74:172–181.
- 592 46. Zhang Y, Kastman EK, Guasto JS, Wolfe BE. 2018. Fungal networks shape dynamics of bacterial  
593 dispersal and community assembly in cheese rind microbiomes. *Nature Communications* 9:336.
- 594 47. Schindelin J, Arganda-Carreras I, Frise E, Kaynig V, Longair M, Pietzsch T, Preibisch S, Rueden C,  
595 Saalfeld S, Schmid B, Tinevez J-Y, White DJ, Hartenstein V, Eliceiri K, Tomancak P, Cardona A.  
596 2012. Fiji: an open-source platform for biological-image analysis. *Nature Methods* 9:676–682.
- 597 48. Bankevich A, Nurk S, Antipov D, Gurevich AA, Dvorkin M, Kulikov AS, Lesin VM, Nikolenko SI,  
598 Pham S, Prjibelski AD, Pyshkin AV, Sirotkin AV, Vyahhi N, Tesler G, Alekseyev MA, Pevzner PA.  
599 2012. SPAdes: a new genome assembly algorithm and its applications to single-cell sequencing.  
600 *J Comput Biol* 19:455–477.

- 601 49. Roux S, Enault F, Hurwitz BL, Sullivan MB. 2015. VirSorter: mining viral signal from microbial  
602 genomic data. *PeerJ* 3:e985.
- 603 50. Arndt D, Grant JR, Marcu A, Sajed T, Pon A, Liang Y, Wishart DS. 2016. PHASTER: a better, faster  
604 version of the PHAST phage search tool. *Nucleic Acids Res* 44:W16–W21.
- 605 51. Altschul SF, Gish W, Miller W, Myers EW, Lipman DJ. 1990. Basic local alignment search tool. *J*  
606 *Mol Biol* 215:403–410.
- 607 52. Langmead B, Salzberg SL. 2012. Fast gapped-read alignment with Bowtie 2. *Nature Methods*  
608 9:357–359.
- 609 53. McMurdie PJ, Holmes S. 2013. phyloseq: an R package for reproducible interactive analysis and  
610 graphics of microbiome census data. *PLOS ONE* 8:e61217.
- 611 54. Kopylova E, Noé L, Touzet H. 2012. SortMeRNA: fast and accurate filtering of ribosomal RNAs in  
612 metatranscriptomic data. *Bioinformatics* 28:3211–3217.
- 613 55. Quast C, Pruesse E, Yilmaz P, Gerken J, Schweer T, Yarza P, Peplies J, Glöckner FO. 2013. The  
614 SILVA ribosomal RNA gene database project: improved data processing and web-based tools.  
615 *Nucleic Acids Res* 41:D590–D596.
- 616 56. Aziz RK, Bartels D, Best AA, DeJongh M, Disz T, Edwards RA, Formsma K, Gerdes S, Glass EM,  
617 Kubal M, Meyer F, Olsen GJ, Olson R, Osterman AL, Overbeek RA, McNeil LK, Paarmann D,  
618 Paczian T, Parrello B, Pusch GD, Reich C, Stevens R, Vassieva O, Vonstein V, Wilke A, Zagnitko O.  
619 2008. The RAST Server: rapid annotations using subsystems technology. *BMC Genomics* 9:75.
- 620 57. Zimmermann L, Stephens A, Nam S-Z, Rau D, Kübler J, Lozajic M, Gabler F, Söding J, Lupas AN,  
621 Alva V. 2018. A completely reimplemented MPI bioinformatics toolkit with a new HHpred  
622 server at its core. *Journal of Molecular Biology* 430:2237–2243.

623 **FIGURE LEGENDS**

624 **FIG 1.** Schematic representation of the experimental procedure for the extraction of virus-like  
625 particles from cheese. The surface of three types of cheese was processed according to four  
626 routes named P1 to P4. Steps 1 (homogenization), 2 (centrifugation), 3 (dilution) and 5  
627 (concentration) are common to all protocols, contrary to steps 4 (filtration) and 6 (chloroform  
628 treatment) which are optional. For each cheese type, three biological replicates (independent  
629 cheeses purchased at the same date and from a unique producer) were performed leading thus  
630 to 12 samples per cheese-type.

631 **FIG 2.** Photographs of iodixanol density gradients after ultracentrifugation of cheese VLP  
632 solutions. Cellular debris and membrane vesicles are concentrated at the top of the 20%  
633 iodixanol layer (red arrow) and VLPs at the top of the 45% iodixanol layer (blue arrow). A  
634 schematic representation of the gradient is shown on the right. S: sample.

635 **FIG 3.** Comparative plot showing the estimated level of bacterial DNA contamination in the  
636 Epoisses cheese virome. The expected percentage (x axis) is based on the % of rDNA reads  
637 detected by SortMeRNA software. This value was used to calculate the estimated % of  
638 bacterial chromosomal DNA using a multiplying factor of (x100) based on estimation that  
639 several copies of rRNA operons (*e.g.* 5 copies of ~5 kb in average) would represent about 1%  
640 of a bacterial chromosome of an average size of 2.5 Mb. The observed % of possible bacterial  
641 contamination was obtained by looking at the % of reads not matching the 124 contigs of the  
642 cheese virome. Yellow (P1), red (P2), green (P3), blue (P4) and orange (vesicles sample).

643 **FIG 4.** Differences in the Epoisses cheese virome composition according to the VLP  
644 extraction procedure. Principal coordinate analysis based on the Bray-Curtis dissimilarity  
645 index (A). Relative abundance of the contigs annotated as probable phages (B, 72 contigs),  
646 plasmids (C, 19 contigs), putative plasmids (D, 20 contigs), unclassified (E, 14 contigs) and  
647 unmapped reads (F).

648 **FIG 5.** Heatmap of the 124 contigs composing the Epoisses virome. Samples were grouped  
649 according to the VLP extraction procedure. Contigs were separated into four categories  
650 (phage, plasmid, putative plasmid and unclassified) according to the annotation results and  
651 sorted by abundance inside each group. Yellow to red: lowest to highest relative abundance.  
652 Grey: not detected. Ves: vesicles sample.

653 **TABLES**

654 **Table 1.** Quantification of VLPs using interferometry and microbial cells using plate  
655 numbering.

| <b>Type of Cheese and of protocol</b> | <b>Total nanoparticles (log per g) (SD)</b> | <b>Presence of cells</b> | <b>Presence of noise</b> | <b>Total biomass (log CFU per g) (SD)</b> | <b>Ratio nanoparticles / cell</b> |
|---------------------------------------|---------------------------------------------|--------------------------|--------------------------|-------------------------------------------|-----------------------------------|
| <b>CAM P1</b>                         | NA                                          | +++                      | +++                      | 8.71 (0.11)                               | NA                                |
| <b>EP P1</b>                          | NA                                          | +++                      | +++                      | 10.10 (0.31)                              | NA                                |
| <b>SN P1</b>                          | NA                                          | +++                      | +++                      | 10.42 (0.07)                              | NA                                |
| <b>CAM P2</b>                         | 10.38 (0.01)                                | ++                       | -                        | 8.71 (0.11)                               | 47.29 (11.91)                     |
| <b>EP P2</b>                          | 10.18 (0.23)                                | +                        | -                        | 10.10 (0.31)                              | 1.88 (2.07)                       |
| <b>SN P2</b>                          | 10.04 (0.24)                                | +                        | -                        | 10.42 (0.07)                              | 0.66 (0.14)                       |
| <b>CAM P3</b>                         | NA                                          | ++                       | +++                      | 8.71 (0.11)                               | NA                                |
| <b>EP P3</b>                          | NA                                          | -                        | +++                      | 10.10 (0.31)                              | NA                                |
| <b>SN P3</b>                          | NA                                          | -                        | +++                      | 10.42 (0.07)                              | NA                                |
| <b>CAM P4</b>                         | 10.00 (0.13)                                | -                        | -                        | 8.71 (0.11)                               | 21.77 (12.15)                     |
| <b>EP P4</b>                          | 10.13 (0.37)                                | -                        | -                        | 10.10 (0.31)                              | 2.40 (3.35)                       |
| <b>SN P4</b>                          | 9.59 (0.40)                                 | -                        | -                        | 10.42 (0.07)                              | 0.17 (0.10)                       |

656

657 NA: not available because of noise in interferometric measures

658 **SUPPLEMENTARY DATA**

659 **Table S1.** Microbiological counts obtained for the nine cheese samples.

660 **Table S2.** DNA quantities obtained for the different samples studied.

661 **Table S3.** Comparison between phage titer and interferometry measure.

662 **Dataset S1.** Sequence comparison results of the 124 contigs composing the Epoisses virome.

663 **Dataset S2.** Predicted function and best BlastP hit for ORFs of Epvir4 and Epvir8.

664 **Fig. S1.** Functional annotation of the three most abundant viral contigs detected in the  
665 Epoisses cheese virome. Predicted functions of the ORFs identified in Epvir4 (A),  
666 949\_Epvir1 (B) and Epvir8 (C) are color-coded as follow: red for integrase, yellow for  
667 transcriptional regulation, orange for replication and recombination, green for DNA  
668 packaging and head, light blue for connector, dark blue for tail, light pink for homing  
669 endonuclease, dark pink for lysis, grey for hypothetical proteins, violet for additional  
670 functions. Some of the predicted functions of the ORFs are detailed for each contig.

671 **Fig. S2.** Comparison between phage concentration as measured by titration and using the  
672 interferometric light microscope (ILM). Six reference phages were used for the comparison,  
673 namely phages P1, T4, T5, T7,  $\lambda$ CI857 and  $\phi$ X174.

674 **Fig. S3.** Epifluorescence image of a VLP solution obtained from Epoisses cheese. The VLP  
675 solution was diluted 10-fold in 1 ml of SM buffer with glutaraldehyde (2.5% final), incubated  
676 10 minutes on ice and then flash frozen in liquid nitrogen. 100  $\mu$ l of the nanoparticle solution  
677 was diluted into 5 ml of filtered water; and then filtered through a 25 mm anodisc membrane  
678 with pore sizes of 0.02  $\mu$ m and stained with 100  $\mu$ L of SYBR Gold (50 $\times$ ) for 15 min in the  
679 dark. Filters were placed on a microscopy slide with 100  $\mu$ L of anti-fading solution  
680 Fluoromount, and observed immediately after preparation on a microscope Leica DMRA2  
681 microscope equipped with a  $\times$  100 magnification oil-immersion objective and a COOLSNAP

682 HQ camera (Roper Scientific, USA), using YFP filters. Images were captured and processed  
683 with METAMORPH V6.3r5.



# Cheese surface (6 g)

Camembert (CAM)

Epoisses (EP)

Saint-Nectaire (SN)

1. Homogenization in Sodium Citrate solution (20 g/l)

2. Centrifugation: 300 x g for 5 min; 5,000 x g for 45 min

3. Dilution 1:5 in SM Buffer

5. Concentration: PEG Precipitation

P1

6. Chloroform  
treatment

P2

4. Filtration: 0.45  $\mu\text{m}$  + 0.22  $\mu\text{m}$

5. Concentration: PEG Precipitation

P3

6. Chloroform  
treatment

P4

Camembert

Epoisses

Saint-Nectaire

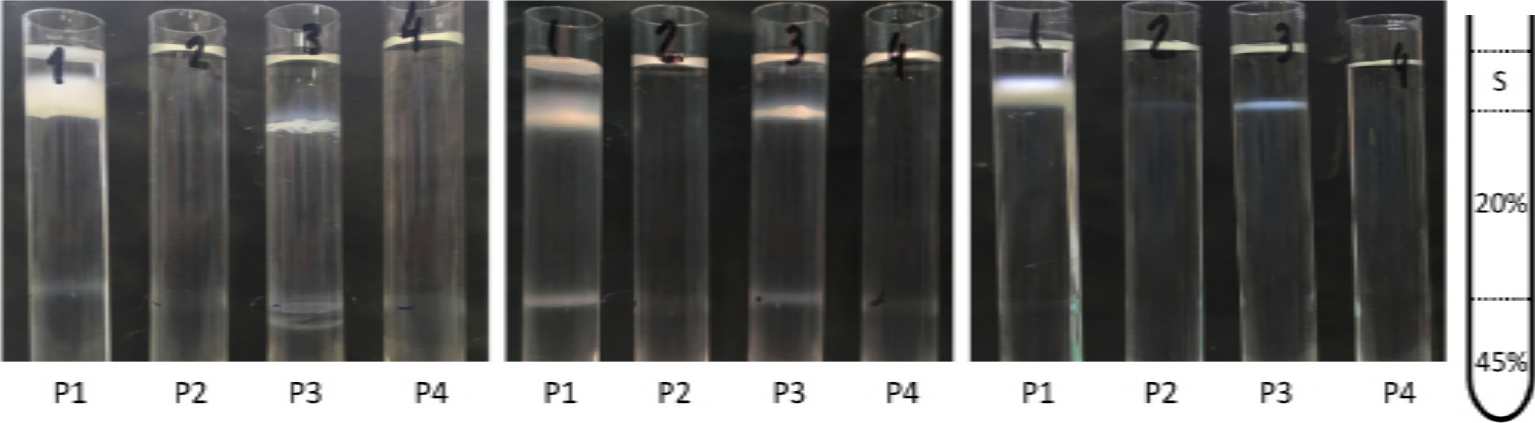

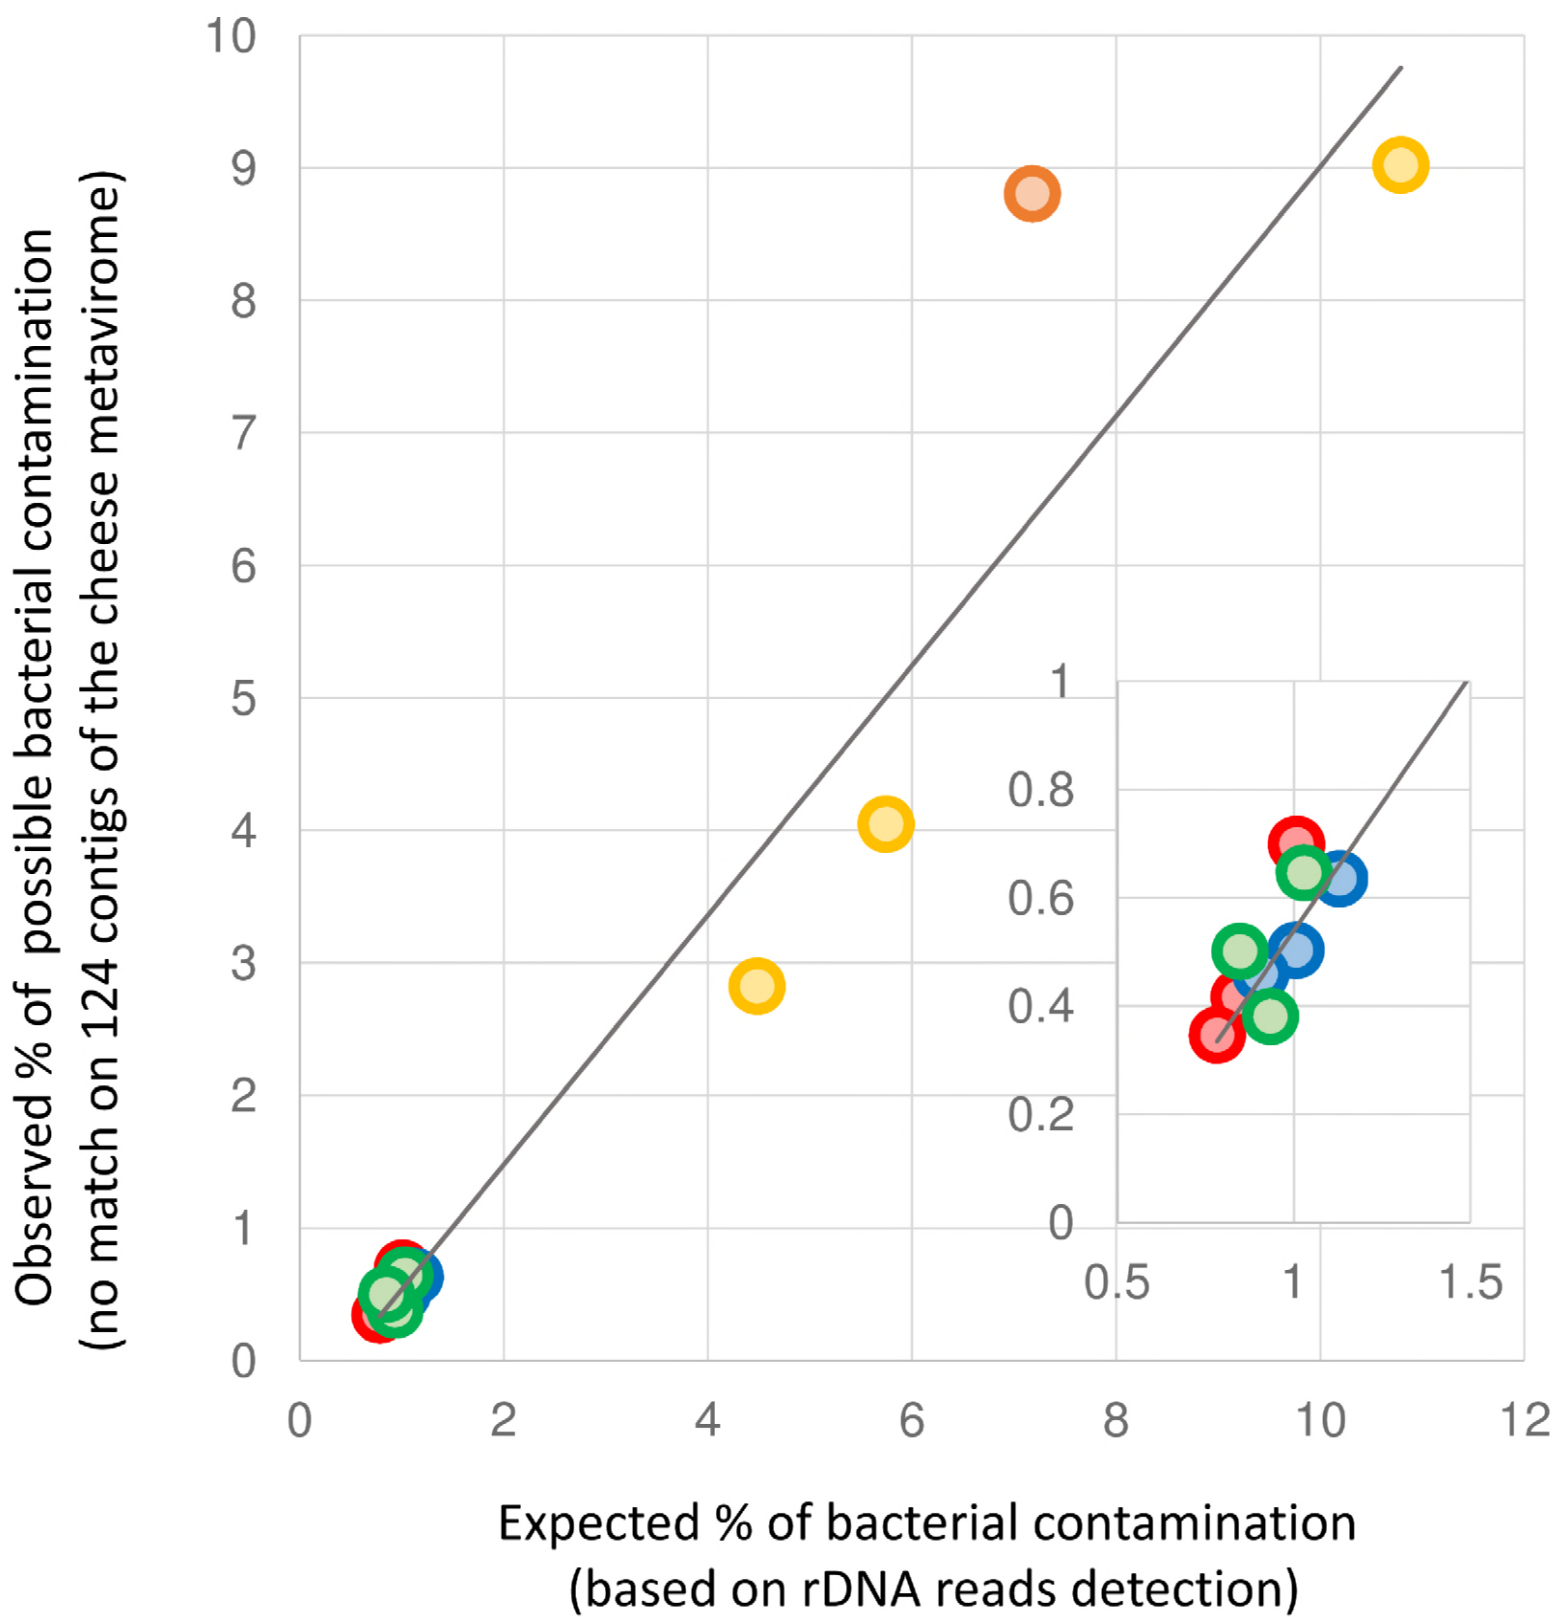

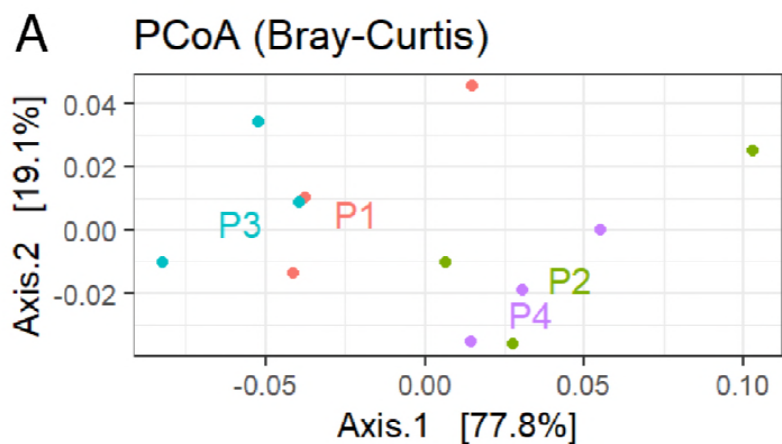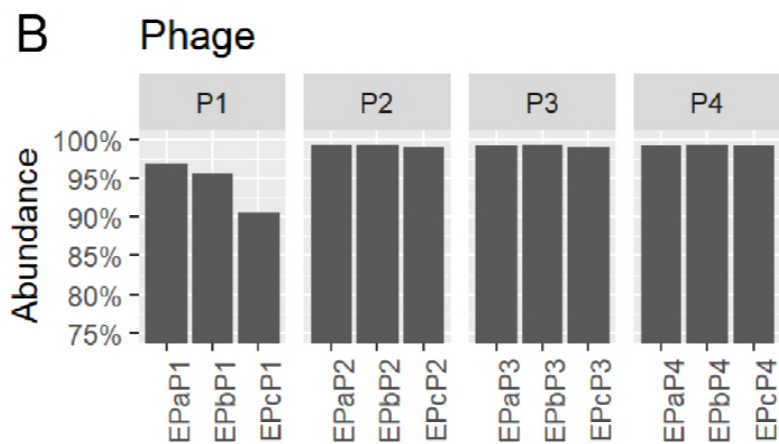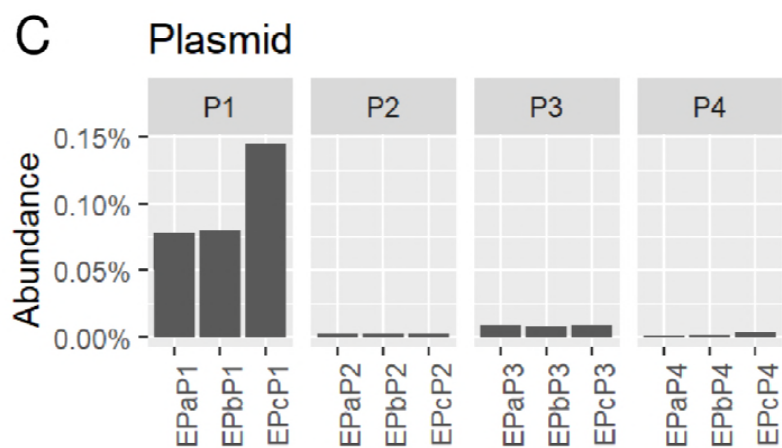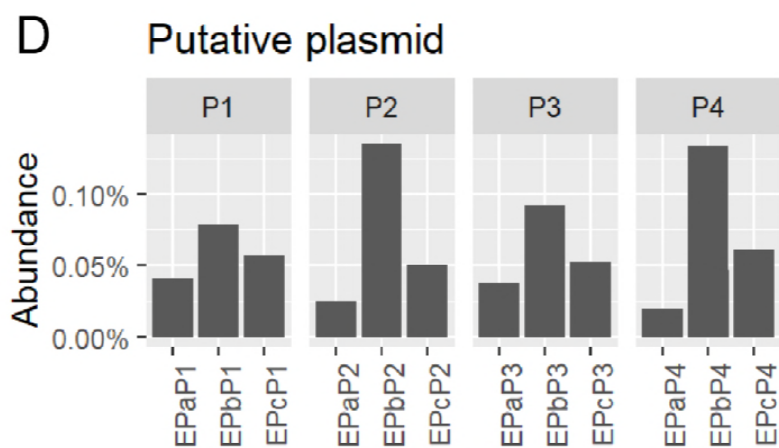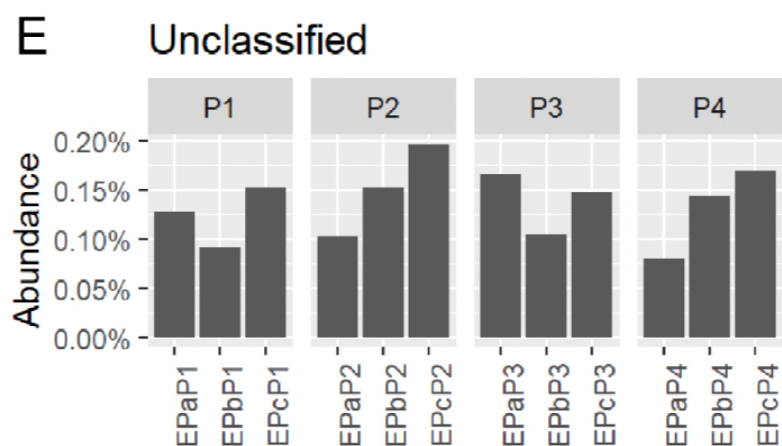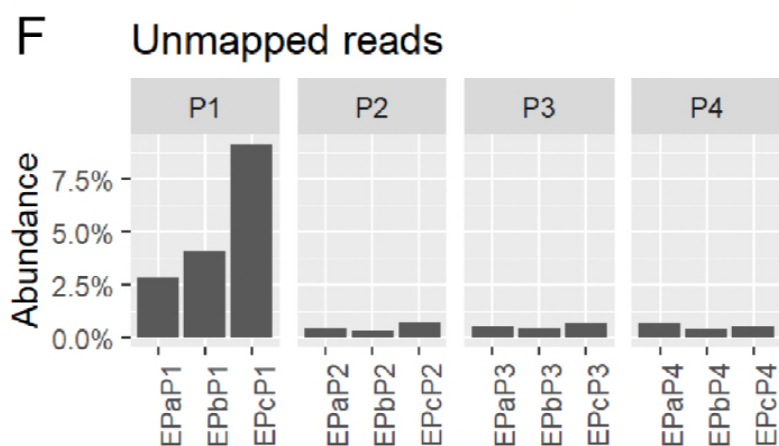

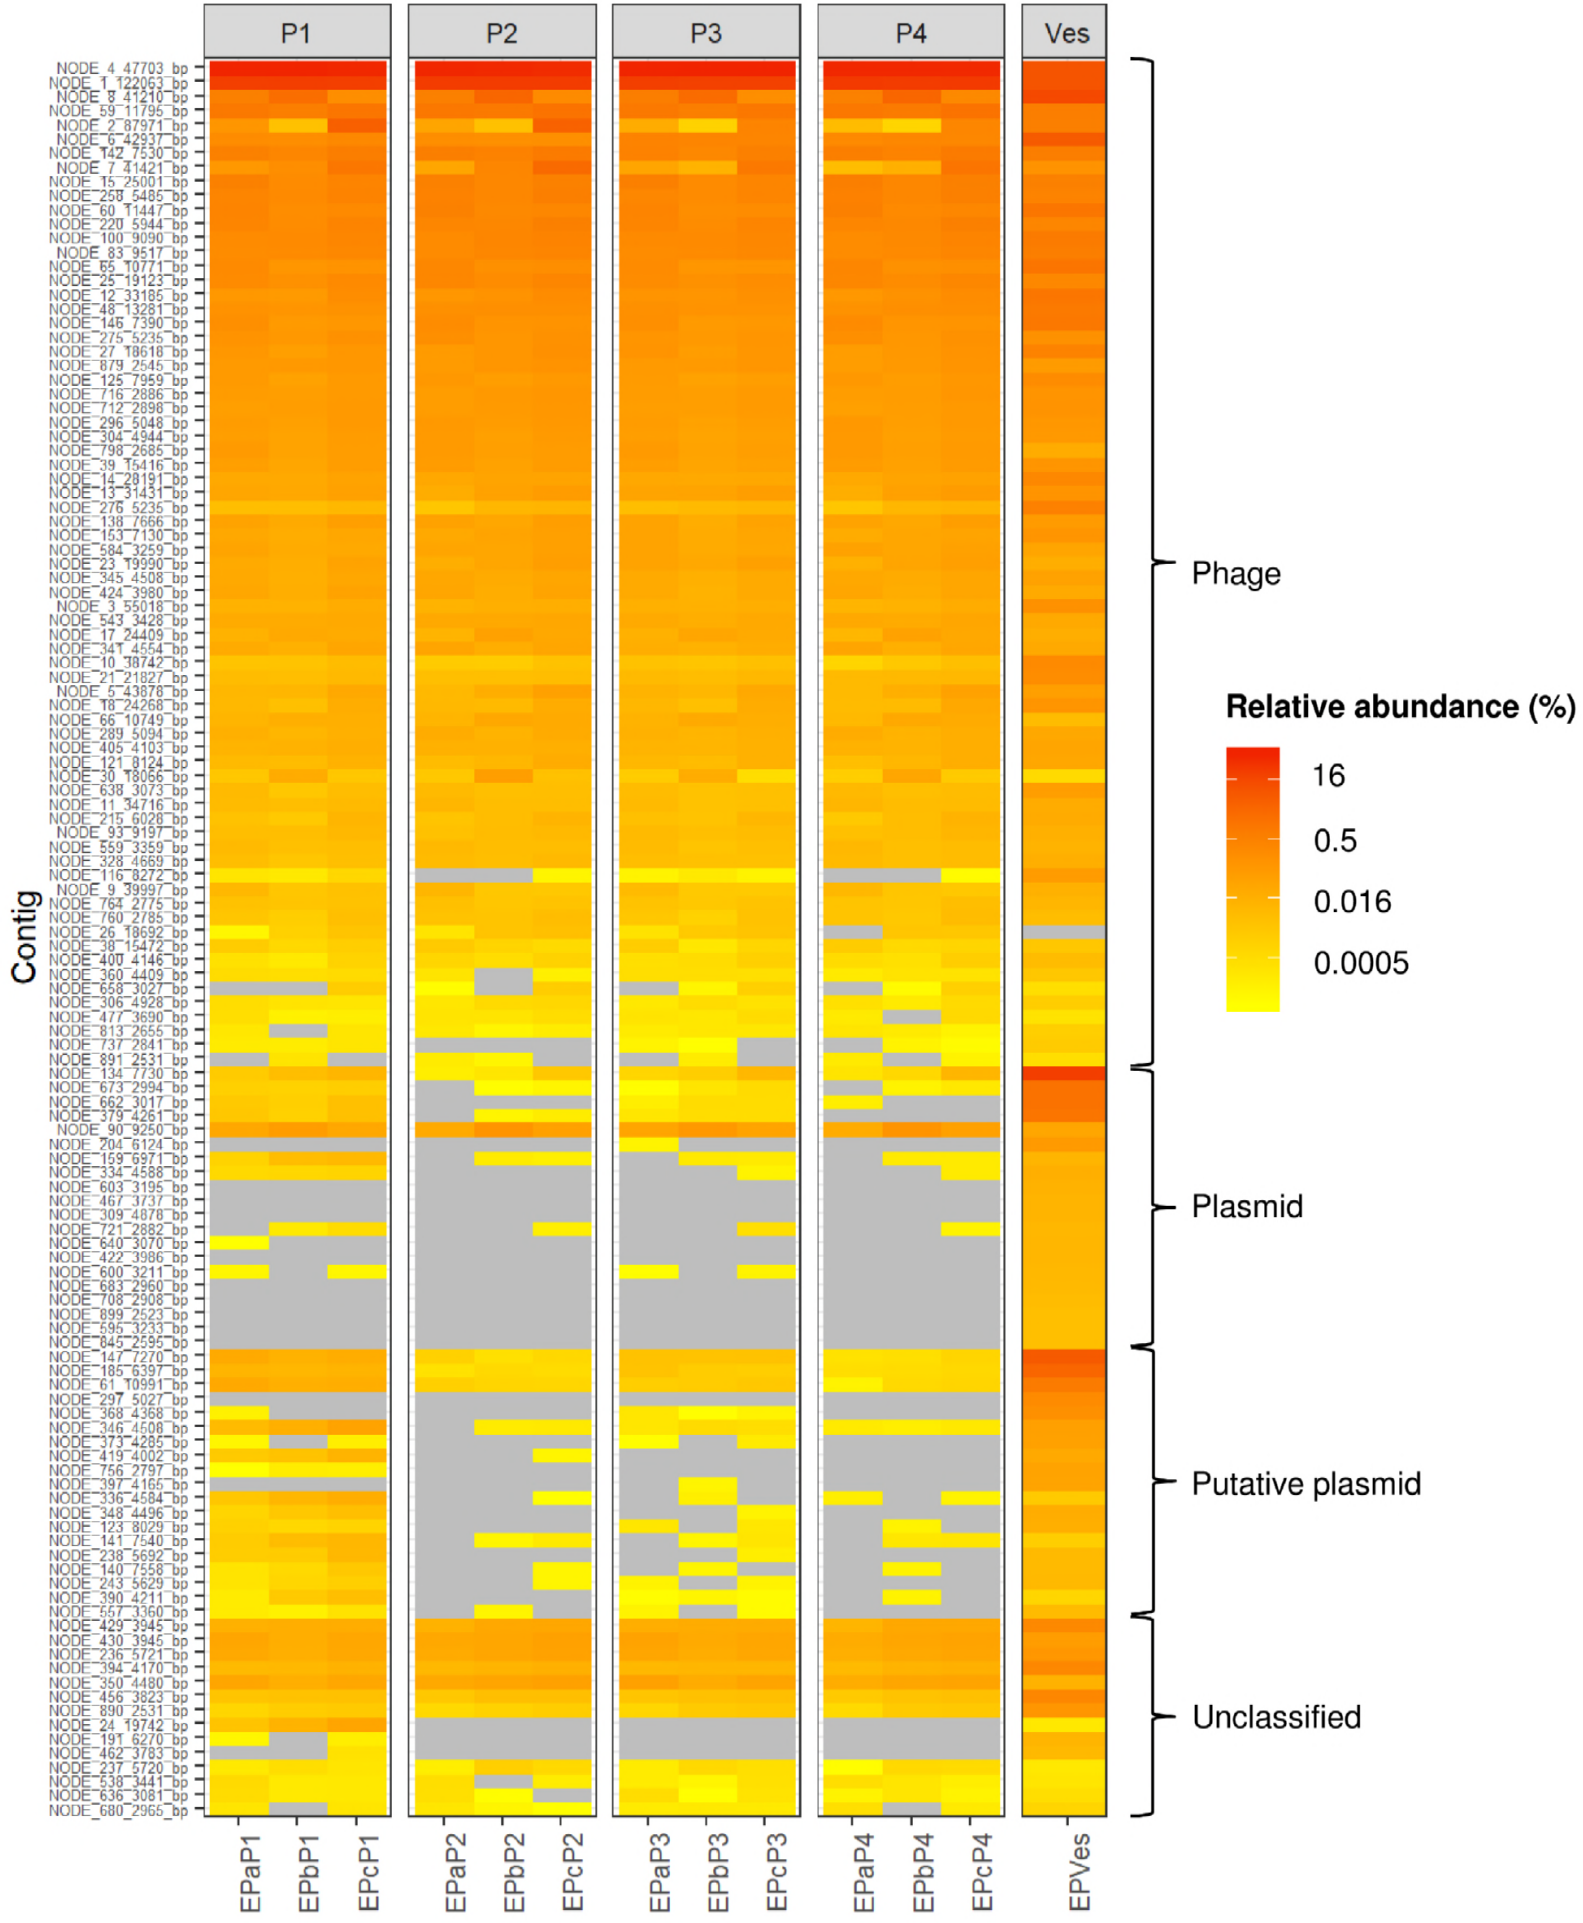

Source: https://www.biorxiv.org/content/biorxiv/early/2018/12/21/503599.full.pdf
